# Supplementary material
Source: Springer Nature journal article supplement (https://www.springerprofessional.de/resource/supplementary/13638_2012_544_MOESM4_ESM.pdf/11898030)
Supplement: MOESM4 [file 11898030]

|               |              |               |              |               |
|---------------|--------------|---------------|--------------|---------------|
| Time Line →   | 0            | $NT_s$        | $2NT_s$      | $3NT_s$       |
| EDMA Transfer | ADC->PING IN | PONG OUT->DAC | ADC->PONG IN | PING OUT->DAC |
| DSP Processes | IDLE         | PING BUFF     | IDLE         | PONG BUFF     |
